# Supplementary material for: Human rhinovirus detection in the lower respiratory tract of hematopoietic cell transplant recipients: association with mortality
Source: PubMed Central journal article supplement — Haematologica. 2017 Jun;102(6):1120–30. doi: 10.3324/haematol.2016.153767 (PMC5451345; doi:10.3324/haematol.2016.153767), 2017-06
Supplement: 2016.153767.SEO_SUPPL.pdf [file 2016.153767.SEO_SUPPL.pdf]

# Human rhinovirus detection in the lower respiratory tract of hematopoietic cell transplant recipients: association with mortality

Sachiko Seo,<sup>1,2</sup> Alpana Waghmare,<sup>1,3,4</sup> Emily M Scott,<sup>5</sup> Hu Xie,<sup>6</sup> Jane M Kuypers,<sup>1,7</sup> Robert C. Hackman,<sup>1</sup> Angela P. Campbell,<sup>1,3,4,\*</sup> Su-Mi Choi,<sup>8</sup> Wendy M. Leisenring,<sup>6</sup> Keith R. Jerome,<sup>1,7</sup> Janet A. Englund<sup>1,3,4</sup> and Michael Boeckh<sup>1,6,9</sup>

<sup>1</sup>Vaccine and Infectious Disease Division, Fred Hutchinson Cancer Research Center, Seattle, WA, USA; <sup>2</sup>Department of Hematology and Oncology, National Cancer Research Center East, Chiba, Japan; <sup>3</sup>Department of Pediatrics, University of Washington, Seattle, WA, USA; <sup>4</sup>Pediatric Infectious Disease Division, Seattle Children's Hospital, WA, USA; <sup>5</sup>School of Medicine, University of Washington, Seattle, WA, USA; <sup>6</sup>Clinical Research Division, Fred Hutchinson Cancer Research Center, Seattle, WA, USA; <sup>7</sup>Department of Laboratory Medicine, University of Washington, Seattle, WA, USA; <sup>8</sup>Division of Infectious Diseases, Department of Internal Medicine, College of Medicine, The Catholic University of Korea, Seoul, Korea and <sup>9</sup>Department of Medicine, University of Washington, Seattle, WA, USA

\*Present affiliation: Centers for Disease Control and Prevention, Atlanta, GA, USA

©2017 Ferrata Storti Foundation. This is an open-access paper. doi:10.3324/haematol.2016.153767

Received: August 1, 2016.

Accepted: January 31, 2017.

Pre-published: February 9, 2017.

Correspondence: mboeckh@fredhutch.org

---

| <b>Supplemental Table 1. Risk factors for mortality from all causes or respiratory failure by day 90 after HRV LRI (N=128)</b> |                             |               |                |                               |               |                |
|--------------------------------------------------------------------------------------------------------------------------------|-----------------------------|---------------|----------------|-------------------------------|---------------|----------------|
|                                                                                                                                | <b>Univariable analysis</b> |               |                | <b>Multivariable analysis</b> |               |                |
|                                                                                                                                | <b>HR</b>                   | <b>95% CI</b> | <b>P Value</b> | <b>HR</b>                     | <b>95% CI</b> | <b>P Value</b> |
| <b>Overall mortality</b>                                                                                                       |                             |               |                |                               |               |                |
| <b>Lymphocyte count at diagnosis</b>                                                                                           |                             |               |                |                               |               |                |
| > 300 cells/ $\mu$ L                                                                                                           | 1.00                        |               |                | 1.00                          |               |                |
| $\leq$ 300 cells/ $\mu$ L                                                                                                      | 2.70                        | 1.49-4.76     | 0.001          | 1.96                          | 1.05-3.66     | 0.036          |
| <b>Monocyte count at diagnosis</b>                                                                                             |                             |               |                |                               |               |                |
| > 300 cells/ $\mu$ L                                                                                                           | 1.00                        |               |                | 1.00                          |               |                |
| $\leq$ 300 cells/ $\mu$ L                                                                                                      | 2.44                        | 1.33-4.55     | 0.004          | 1.49                          | 0.75-3.03     | 0.26           |
| <b>LRI symptoms at diagnosis</b>                                                                                               |                             |               |                |                               |               |                |
| No                                                                                                                             | 1.00                        |               |                | 1.00                          |               |                |
| Yes                                                                                                                            | 3.03                        | 1.37-6.74     | 0.006          | 1.42                          | 0.50-4.08     | 0.51           |
| <b>Oxygen use at diagnosis</b>                                                                                                 |                             |               |                |                               |               |                |
| No                                                                                                                             | 1.00                        |               |                | 1.00                          |               |                |
| Yes                                                                                                                            | 2.94                        | 1.54-5.62     | 0.001          | 2.87                          | 1.25-6.60     | 0.013          |
| Mechanical ventilation                                                                                                         | 10.3                        | 4.82-22.0     | <0.001         |                               |               |                |
| <b>Steroid dose before diagnosis*</b>                                                                                          |                             |               |                |                               |               |                |
| No                                                                                                                             | 1.00                        |               |                | 1.00                          |               |                |
| < 1 mg/kg                                                                                                                      | 0.82                        | 0.41-1.64     | 0.58           |                               |               |                |
| $\geq$ 1 mg/kg                                                                                                                 | 3.69                        | 1.93-7.03     | <0.001         |                               |               |                |
| <b>Steroid dose after diagnosis<sup>#</sup></b>                                                                                |                             |               |                |                               |               |                |
| No                                                                                                                             | 1.00                        |               |                | 1.00                          |               |                |
| < 1 mg/kg                                                                                                                      | 1.39                        | 0.64-3.0      | 0.40           |                               |               |                |

|                                                 |      |               |        |      |               |       |
|-------------------------------------------------|------|---------------|--------|------|---------------|-------|
|                                                 |      | 1             |        |      |               |       |
| ≥ 1 mg/kg                                       | 4.92 | 2.39-10.<br>1 | <0.001 | 2.55 | 1.39-4.6<br>9 | 0.003 |
| <b>Ct value at diagnosis<sup>†</sup></b>        | 0.99 | 0.95-1.0<br>4 | 0.70   |      |               |       |
| <b>Mortality from respiratory failure</b>       |      |               |        |      |               |       |
| <b>Lymphocyte count at diagnosis</b>            |      |               |        |      |               |       |
| > 300 cells/μL                                  | 1.00 |               |        | 1.00 |               |       |
| ≤ 300 cells/μL                                  | 2.50 | 1.30-4.7<br>6 | 0.006  | 1.87 | 0.93-3.7<br>5 | 0.08  |
| <b>Monocyte count at diagnosis</b>              |      |               |        |      |               |       |
| > 300 cells/μL                                  | 1.00 |               |        | 1.00 |               |       |
| ≤ 300 cells/μL                                  | 2.44 | 1.22-4.7<br>6 | 0.012  | 1.12 | 0.54-2.3<br>4 | 0.75  |
| <b>LRI symptoms at diagnosis</b>                |      |               |        |      |               |       |
| No                                              | 1.00 |               |        | 1.00 |               |       |
| Yes                                             | 4.28 | 1.52-12.<br>0 | 0.006  | 2.40 | 0.70-8.2<br>6 | 0.16  |
| <b>Oxygen use at diagnosis</b>                  |      |               |        |      |               |       |
| No                                              | 1.00 |               |        | 1.00 |               |       |
| Yes                                             | 2.72 | 1.31-5.6<br>6 | 0.007  | 2.09 | 0.89-4.9<br>3 | 0.09  |
| Mechanical ventilation                          | 10.3 | 4.47-23.<br>8 | <0.001 |      |               |       |
| <b>Steroid dose before diagnosis*</b>           |      |               |        |      |               |       |
| No                                              | 1.00 |               |        | 1.00 |               |       |
| < 1 mg/kg                                       | 1.22 | 0.55-2.6<br>7 | 0.63   |      |               |       |
| ≥ 1 mg/kg                                       | 4.65 | 2.18-9.9<br>2 | <0.001 | 2.25 | 1.11-4.5<br>8 | 0.025 |
| <b>Steroid dose after diagnosis<sup>#</sup></b> |      |               |        |      |               |       |
| No                                              | 1.00 |               |        | 1.00 |               |       |
| < 1 mg/kg                                       | 1.68 | 0.66-4.3      | 0.28   |      |               |       |

|                                           |      |               |        |      |               |       |
|-------------------------------------------|------|---------------|--------|------|---------------|-------|
|                                           |      | 0             |        |      |               |       |
| ≥ 1 mg/kg                                 | 6.90 | 2.90-16.<br>4 | <0.001 | 2.77 | 1.39-5.5<br>2 | 0.004 |
| <b>Ct value at diagnosis</b> <sup>†</sup> | 0.99 | 0.94-1.0<br>4 | 0.68   |      |               |       |

\* Peak steroid dose was recorded from the period within two weeks prior to LRI.

# Peak steroid dose after LRI diagnosis was recorded from within two weeks after the diagnosis. These variables are analyzed as time-dependent.

<sup>†</sup>This analysis was performed as a continuous variable.

All variables in Table 1 were used for the univariable analysis. Only variables with  $p < 0.05$  are shown in this table. Ct value was shown regardless of p values.

Abbreviations; HRV: human rhinovirus, LRI: lower respiratory tract infection, Ct: cycle threshold
