# Supplementary material for: Human rhinovirus detection in the lower respiratory tract of hematopoietic cell transplant recipients: association with mortality
Source: PubMed Central journal article supplement — Haematologica. 2017 Jun;102(6):1120–30. doi: 10.3324/haematol.2016.153767 (PMC5451345; doi:10.3324/haematol.2016.153767), 2017-06
Supplement: 2016_153767-Disclosures_and_Contributions.pdf [file 2016_153767-Disclosures_and_Contributions.pdf]

Haematologica  
HAEMATOL/2016/153767  
Version 4

Human rhinovirus detection in the lower respiratory tract of  
hematopoietic cell transplant recipients: association with mortality

Sachiko Seo, Alpana Waghmare, Emily M. Scott, Hu Xie, Jane M. Kuypers, Robert C. Hackman, Angela P. Campbell, Su-Mi Choi, Wendy M. Leisenring, Keith R. Jerome, Janet A. Englund, and Michael Boeckh

Disclosures: SS:The Joel Meyers Endowment Scholarship AW:none EMS:none HX:none JMK:none RCH:none APC:none SC:none WML:none KRJ:none JAE:research support from Chimerix Inc., Gilead Sciences Pfizer, GlaxoSmithKline, and Roche, and consultant fees from Gilead Sciences and Pfizer MB:grants [K24HL093294, K23AI114844, and CA15704] from the National Institutes of Health, research support from Gilead Sciences, Ansun Biopharma, and Aviragen Therapeutics, Inc., and consultant fees from Aviragen Therapeutics, Inc. and Gilead Sciences

Contributions: MB was the principal investigator and takes primary responsibility for the paper; MB and JAE designed the study; SS, EMS, AW and SC collected the data; HX and WL participated in the statistical analysis; JMK performed the PCR assay; RCH reviewed lung tissue samples; APC and KRJ advised regarding the analysis of the study; SS and MB wrote the manuscript.
